# Supplementary material for: Marker-trait association analysis for easy fruit destemming and mechanical harvestability traits in New Mexican chile pepper (Capsicum annuum L.)
Source: Frontiers journal article supplement (doi:10.3389/fhort.2024.1448159), 2024-08-19
Supplement: Table_6.XLSX [file Table_6.XLSX]

## Sheet: Sheet1
Table S6. Significant SNP markers identified for the MH-CAMP using multi-locus GWAS approaches.
Trait	Model	SNP	Chr.	Marker position (Mb)	QTL effect	LOD score	-log10(P)'	R2 (%)	Minor allele frequency	Genotype
PHT	mrMLM	SCM002812.1_125723048	1	125.723	-2.4828	5.2673	6.0739	4.1464	0.0568	GG
PHT	mrMLM	SCM002812.1_22395331	1	22.3953	-3.0206	4.1327	4.8907	18.7647	0.2955	CC
PHT	mrMLM	SCM002814.1_37019132	3	37.0191	1.9122	3.26	3.9714	2.0739	0.0511	GG
PHT	mrMLM	SCM002823.1_186111625	12	186.112	4.7641	3.8685	4.6135	55.4025	0.3693	TT
PHT	mrMLM	SCM002823.1_12358547	12	12.3585	2.0627	5.9923	6.8251	2.8619	0.0511	GG
PHT	FASTmrMLM	SCM002822.1_1169164	11	1.16916	-1.6292	3.0826	3.7831	12.6919	0.1056	GG
PHT	ISIS EM-BLASSO	SCM002814.1_247170709	3	247.171	1.0944	3.0163	3.7126	9.5481	0.2889	TT
PHT	ISIS EM-BLASSO	SCM002822.1_178459215	11	178.459	1.1715	3.1596	3.8649	12.793	0.4056	CC
PWDT	mrMLM	SCM002812.1_66183191	1	66.1832	5.819	3.3994	4.1189	21.2203	0.0852	CC
PWDT	mrMLM	SCM002814.1_256487559	3	256.488	5.3549	3.1148	3.8173	7.6496	0.0511	CC
PWDT	mrMLM	SCM002815.1_200715504	4	200.716	4.44	3.0602	3.7593	19.3661	0.1818	CC
PWDT	mrMLM	SCM002821.1_203211282	10	203.211	4.74	4.0821	4.8377	17.2318	0.1193	AA
PWDT	FASTmrMLM	SCM002814.1_55977842	3	55.9778	2.0945	3.0726	3.7725	8.2492	0.4389	AA
PWDT	FASTmrMLM	SCM002820.1_20749917	9	20.7499	-2.3179	3.5703	4.2995	10.5184	0.4444	CC
NBB	pLARmEB	SCM002815.1_200231316	4	200.231	-0.0696	8.8507	9.7636	2.8612	0.1833	TT
NBB	FASTmrMLM	SCM002816.1_104942	5	0.104942	7.9993e-05	3.4939	4.2188	1.0316e-05	0.3222	AA
NBB	FASTmrMLM	SCM002817.1_163239625	6	163.24	-6.1616e-05	3.5283	4.2551	5.8473e-06	0.2444	AA
NBB	FASTmrMLM	SCM002819.1_130895675	8	130.896	3.4954e-05	3.0076	3.7033	2.2511e-06	0.45	TT
NBB	FASTmrEMMA	SCM002814.1_248773989	3	248.774	0.3429	4.3511	5.1194	10.0928	0.05	AA
NBB	FASTmrEMMA	SCM002815.1_53724974	4	53.725	-0.1741	3.4114	4.1316	12.3619	0.4167	TT
NBB	pLARmEB	SCM002812.1_22395498	1	22.3955	-2.7649e-05	3.7245	4.462	2.1134e-07	0.0667	CT
NBB	pLARmEB	SCM002812.1_296765341	1	296.765	-0.0815	11.5303	12.4983	4.8678	0.2167	CC
NBB	pLARmEB	SCM002814.1_200105782	3	200.106	-0.0003	4.2951	5.0608	7.883e-05	0.15	GG
NBB	pLARmEB	SCM002816.1_55059	5	0.055059	0.0005	4.2689	5.0334	0.0001	0.1889	TT
NBB	pLARmEB	SCM002820.1_145988493	9	145.988	0.0593	4.9313	5.7246	1.6726	0.1333	CC
NBB	pLARmEB	SCM002820.1_180169759	9	180.17	0.0011	6.2195	7.0598	0.001	0.3833	AT
NBB	pLARmEB	SCM002821.1_193606260	10	193.606	-0.0297	9.1015	10.0202	0.5455	0.2	AA
NBB	pLARmEB	SCM002821.1_195327086	10	195.327	-3.1614e-05	3.0966	3.798	4.4515e-07	0.1333	TT
HTFPB	mrMLM	SCM002813.1_148953317	2	148.953	0.5797	3.1175	3.8202	10.4178	0.0795	CC
HTFPB	mrMLM	SCM002814.1_109222586	3	109.223	0.8442	5.6431	6.4637	24	0.0568	AA
HTFPB	mrMLM	SCM002821.1_173932300	10	173.932	0.5494	3.9714	4.7215	16.9454	0.2273	CC
HTFPB	ISIS EM-BLASSO	SCM002816.1_186377753	5	186.378	0.3975	5.027	5.8242	13.3093	0.2278	AA
HTFPB	ISIS EM-BLASSO	SCM002817.1_89711373	6	89.7114	-0.6564	4.4814	5.2556	10.6441	0.05	GG
HTFPB	ISIS EM-BLASSO	SCM002820.1_15544819	9	15.5448	0.2332	3.7017	4.438	6.3496	0.4944	TT
HTFPB	ISIS EM-BLASSO	SCM002820.1_214843872	9	214.844	-0.3772	4.5846	5.3633	4.1694	0.0667	TT
HTFPB	ISIS EM-BLASSO	SCM002822.1_7301124	11	7.30112	-0.3269	4.2547	5.0185	8.052	0.1833	CT
DTFN	mrMLM	SCM002813.1_104210532	2	104.211	-0.3724	3.2633	3.9749	19.4694	0.1364	TT
DTFN	FASTmrEMMA	SCM002818.1_219380408	7	219.38	-0.5099	3.4013	4.1209	12.8896	0.2611	GG
DTFN	FASTmrMLM	SCM002822.1_203900715	11	203.901	-0.0018	3.9277	4.6757	0.0006	0.2722	TT
DTFN	ISIS EM-BLASSO	SCM002818.1_219287718	7	219.288	0.3378	3.5991	4.3298	10.2367	0.0667	AA
DSFR	FASTmrEMMA	SCM002814.1_261284271	3	261.284	5.8927	3.2015	3.9093	16.6789	0.4833	AA
DSFG	mrMLM	SCM002812.1_8532465	1	8.53247	-2.6247	3.0289	3.726	0.9049	0.0739	GG
DSFG	mrMLM	SCM002812.1_2429889	1	2.42989	7.193	3.0968	3.7982	17.3023	0.4148	TT
DSFG	mrMLM	SCM002814.1_26801275	3	26.8013	-9.7789	5.5276	6.344	7.3228	0.0511	TT
DSFG	mrMLM	SCM002815.1_213914908	4	213.915	9.1078	6.3159	7.1594	7.533	0.0682	TT
DSFG	mrMLM	SCM002817.1_176923810	6	176.924	-7.3295	4.6106	5.3905	19.1266	0.4261	AA
DSFG	mrMLM	SCM002818.1_196042040	7	196.042	13.4806	7.7378	8.6229	19.024	0.0511	AA
DSFG	ISIS EM-BLASSO	SCM002813.1_140023085	2	140.023	5.5604	6.6074	7.4601	13.9017	0.2944	AA
DSFG	ISIS EM-BLASSO	SCM002817.1_32559951	6	32.56	-6.2806	5.238	6.0435	7.1831	0.1	AA
DSFG	ISIS EM-BLASSO	SCM002819.1_128239116	8	128.239	5.2228	4.5873	5.3661	6.8207	0.1444	AA
DSFG	pLARmEB	SCM002812.1_44153185	1	44.1532	6.0644	5.7842	6.6098	9.1011	0.1778	GG
DSFG	pLARmEB	SCM002812.1_266897865	1	266.898	6.1191	6.8765	7.7374	13.0786	0.3722	GG
DSFG	pLARmEB	SCM002821.1_3684381	10	3.68438	3.0257	3.4716	4.1953	3.3857	0.4056	TT
DSFG	ISIS EM-BLASSO	SCM002813.1_157400654	2	157.401	-2.8193	3.1616	3.867	3.9889	0.3889	CC
DSRR	mrMLM	SCM002821.1_2290233	10	2.29023	0.1461	3.5889	4.3191	24.3363	0.1591	TT
DSRR	FASTmrMLM	SCM002819.1_112760945	8	112.761	0.1191	4.4759	5.2498	13.6744	0.1222	TT
DSRR	ISIS EM-BLASSO	SCM002816.1_205188762	5	205.189	0.1603	3.1523	3.8571	14.3683	0.0556	AA
DSRR	ISIS EM-BLASSO	SCM002819.1_112320026	8	112.32	0.1893	7.071	7.9376	17.3967	0.0667	CC
DSRR	pLARmEB	SCM002820.1_6065359	9	6.06536	0.0001	3.0136	3.7097	7.6319e-06	0.3278	AA
DSRR	ISIS EM-BLASSO	SCM002812.1_14365105	1	14.3651	0.003	3.8457	4.5895	0.0068	0.1	CC
DSRG	mrMLM	SCM002812.1_169788893	1	169.789	0.2837	3.0479	3.7462	16.5922	0.0795	CC
DSRG	FASTmrMLM	SCM002814.1_218672891	3	218.673	-0.102	3.8669	4.6118	6.6444	0.3056	CC
DSRG	FASTmrMLM	SCM002822.1_177952684	11	177.953	-0.168	3.8581	4.6025	19.272	0.3833	TT
DSRG	FASTmrEMMA	SCM002823.1_225769243	12	225.769	-0.3577	4.2358	4.9988	20.7114	0.4722	TT
DSRG	ISIS EM-BLASSO	SCM002812.1_168760991	1	168.761	0.2487	5.2209	6.0257	12.5545	0.0833	CC
DSRG	pLARmEB	SCM002821.1_963182	10	0.963182	0.2449	4.0659	4.8207	2.2937	0.0556	TT
DSRG	ISIS EM-BLASSO	SCM002819.1_113768871	8	113.769	0.5096	8.9455	9.8606	40.5075	0.0556	AA
RED	mrMLM	SCM002812.1_180679242	1	180.679	0.1036	6.101	6.9374	6.2327	0.2159	AA
RED	mrMLM	SCM002812.1_85853653	1	85.8537	0.1267	3.8154	4.5576	9.6719	0.1307	AA
RED	mrMLM	SCM002815.1_144763360	4	144.763	-0.1961	3.8559	4.6002	12.0591	0.0511	GG
RED	mrMLM	SCM002816.1_175954532	5	175.955	-0.113	4.0557	4.81	8.4714	0.2216	TT
RED	mrMLM	SCM002819.1_146961071	8	146.961	-0.3027	3.8579	4.6023	34.2503	0.0625	TT
RED	ISIS EM-BLASSO	SCM002814.1_260456773	3	260.457	0.1067	5.3786	6.1895	14.341	0.3	AA
RED	FASTmrMLM	SCM002817.1_210746241	6	210.746	-0.2668	6.6812	7.5362	21.5647	0.05	TT
RED	pLARmEB	SCM002812.1_188864466	1	188.864	-0.1133	4.0742	4.8294	1.5406	0.0778	TT
GRN	mrMLM	SCM002816.1_175954532	5	175.955	-0.1407	3.617	4.3487	9.1006	0.2216	TT
GRN	mrMLM	SCM002819.1_146961071	8	146.961	-0.3258	3.8453	4.5891	27.5228	0.0625	TT
GRN	mrMLM	SCM002820.1_5466908	9	5.46691	-0.3066	4.4487	5.2214	29.8508	0.0739	CC
GRN	mrMLM	SCM002823.1_178410462	12	178.41	-0.2052	3.6781	4.4131	7.3035	0.0625	AA
GRN	FASTmrMLM	SCM002814.1_244710761	3	244.711	-0.0889	5.7651	6.59	2.9479	0.0889	AA
GRN	ISIS EM-BLASSO	SCM002814.1_260456773	3	260.457	0.1478	10.2901	11.2343	20.9059	0.3	AA
GRN	FASTmrMLM	SCM002816.1_1749348	5	1.74935	-0.1554	3.0091	3.7049	11.9394	0.1	AA
GRN	FASTmrMLM	SCM002816.1_175767899	5	175.768	-0.0006	3.6057	4.3368	0.0004	0.4056	GG
GRN	ISIS EM-BLASSO	SCM002817.1_210746241	6	210.746	-0.3307	10.8846	11.8405	25.1529	0.05	TT
GRN	FASTmrMLM	SCM002818.1_1611150	7	1.61115	0.0011	3.0253	3.7222	0.001	0.2222	TT
GRN	FASTmrEMMA	SCM002822.1_182709579	11	182.71	-0.2601	3.9287	4.6767	19.8939	0.4278	AA
GRN	ISIS EM-BLASSO	SCM002814.1_3290766	3	3.29077	-0.062	3.7581	4.4973	3.8019	0.3333	GG
