# Supplementary material for: Marker-trait association analysis for easy fruit destemming and mechanical harvestability traits in New Mexican chile pepper (Capsicum annuum L.)
Source: Frontiers journal article supplement (doi:10.3389/fhort.2024.1448159), 2024-08-19
Supplement: Table_8.XLSX [file Table_8.XLSX]

## Sheet: Sheet1
Table S8. Raw mean data for plant architecture, destemming rate, destemming force, and yield parameters for the MH-CAMP.
Genotype	Block	PHT	PWDT	DTFN	HTFPB	NBB	DSFR	DSFG	DSRR	DSRG	GRN	RED
CHECK1	1	41.4	27.3	2.8	26	0	68.4286	60.7	3	2.125	0.8885	0.724
CHECK2	1	49.8	30.25	2.3	19.4	0.4	67.125	66.6	2.875	1.8	0.7676	0.661
CHECK3	1	59.5	37.5	2.6	25	0.4	61.8571	44.7778	3.28571	4.88889	0.5617	0.6885
GBS012	1	37.7	12	1.5	5.8	0	53.8	52	5	5	0.0157	0.0209
GBS031	1	48.2	33	3	19.2	0.4	28	50.625	3.14286	3.2	0.56	0.669
GBS020	1	40	25.8	3	14.4	1	45.25	27.875	4	4.5	0.1841	0.152
GBS008	1	49	29.6	2.81	18.7	0.4	61.8571	61.375	4.25	3.75	0.7025	0.3452
GBS005	1	55	35.2	1.6	19.6	0.8	59.375	40	4.875	4.875	0.4145	0.3928
GBS004	1	51.2	27.12	2.2	16.1	1	63.25	56.8	5	4.6	0.4118	0.3308
GBS001	1	45.5	32.2	2	20.1	0.2	56.2	57.3	4	3.9	0.7955	0.6795
GBS017	1	45	27.7	2.5	18.8	0	52.4444	61.2	4.7	4.8	0.4555	0.3868
GBS006	1	47.4	28.8	2.4	19.4	0.2	60.2	63	4.3	3.75	0.6554	0.3425
CHECK1	2	43.8	34.4	3.2	10.6	0	68.5	62.5	3.5	1.75	0.7429	0.8575
CHECK2	2	43.5	40.4	3	12.3	0	62.8	63.6	1.625	1.7	0.7676	0.661
CHECK3	2	47.1	39	1.6	13.1	0.6	61.8571	55.6	3.28571	5	0.606	0.6875
GBS007	2	40.4	40	4.9	12.4	0.4	51.6	65.5556	4.125	4.66667	0.2956	0.2684
GBS285	2	25.4	32.4	2.6	8.1	0	65.5	48.5	3.28571	5	1.2345	0.7404
GBS010	2	44.4	44	3.8	14.6	0	39.25	47	5	5	0.3035	0.3501
GBS056	2	34.8	36.2	2.4	10.8	3	35.7143	39	5	5	0.1235	0.1288
GBS013	2	41.2	39	4.7	15.7	0	55.4286	56	4.42857	4.66667	0.6646	0.4978
GBS030	2	54	38.8	2.9	14.9	0.2	60.5	52.25	4	4.25	0.4003	0.3765
GBS044	2	39.4	38.2	2.7	13.9	0.2	62	60.375	4.5	3	0.6365	0.5215
GBS885	2	37.6	39.4	4.4	9.2	0	57.75	58.6	3.875	4.8	0.3552	0.312
GBS933	2	37.5	46.5	3.5	9.5	0	34.613	37.1	4.2	4.6	0.274	0.105
CHECK1	3	47	31.6	2.8	22.6	1.4	68.6667	63.1111	1.83333	1.55556	0.582	0.7835
CHECK2	3	41.2	27.4	3.2	20	1.6	59.2	58	5	2.33333	0.6185	0.5792
CHECK3	3	28	23.5	1	1	0	60.785	54.678	3.6	1.25	0.4242	0.4895
GBS893	3	55.8	32.8	5.8	22.2	1.6	31.25	53.3333	5	4.33333	0.5435	0.4265
GBS270	3	36.8	29.4	4.2	11.8	1	28.2857	62.2857	5	4.14286	0.2056	0.1795
GBS873	3	36.8	28	5.6	16	1.4	57.2	62	4.16667	4	0.5925	0.5382
GBS042	3	25.8	23.4	3.2	9	2.2	28.567	24.2222	5	5	0.195	0.194
GBS874	3	47.6	36.5	5	15.6	1.8	54.5	58.2857	4.25	3	0.325	0.5128
GBS033	3	34	28.2	6.33333	14.6667	0.666667	37.456	34	2.257	2.77778	0.2495	0.1028
GBS048	3	44.2	34.2	3.6	18.6	2.4	56.2222	65.25	3.66667	3.5	0.6183	0.6675
GBS902	3	31.2	26.8	4.2	10.8	1.4	36.75	56.8889	3.875	4	0.5322	0.5042
GBS043	3	31.8	23	2.8	8.6	2	32.456	35.1429	5	5	0.2578	0.2658
GBS888	3	38	26.8	2.4	7.2	1.6	18.8	19.4286	5	5	0.2564	0.2876
CHECK1	4	43.4	27.4	3.6	20	2	65.459	64.75	2	2	0.6072	0.5208
CHECK2	4	42.2	20.6	5	13.4	1	58.654	59.75	1.875	1.75	0.788	0.6545
CHECK3	4	44.6	36.2	5	21	2.6	32.8889	62.4	5	4.9	0.8135	0.7125
GBS896	4	48.6667	28.6667	6	22.33	0	42.546	43.4	3.7	3.2	0.435	0.476
GBS899	4	41.6	26.2	5.2	18	1.6	35.6	43.8	3.4	4.5	0.2551	0.1496
GBS891	4	63	37.4	2.4	15.2	1	29.1429	32	5	5	0.2155	0.1778
GBS871	4	48.8	28	4.8	17.8	1.6	52	62.8571	3.5	1.28571	0.6659	0.8005
GBS284	4	32	23.2	2.8	12.4	1.2	53.765	54	5	5	1.5505	1.6465
GBS002	4	47.4	30.4	4	13.4	2.6	62	55.75	5	4.5	0.5905	0.5508
GBS887	4	45.2	27.4	5.4	12	1.6	39.7143	45	4.85714	4.875	0.4567	0.4163
GBS884	4	49.2	33.8	3	13.4	1.4	45.678	41.7143	5	5	0.831	0.7122
GBS934	4	40	30.8	7.6	17	1.4	54.5	53.8	3.25	4.125	0.6925	0.5276
CHECK1	5	48	43	1.66667	16	0	65.439	69.5	3	2.875	0.5325	0.5375
CHECK2	5	43.5	31	1.875	16.375	0.75	66	60	3.2	2.1	0.7885	0.6585
CHECK3	5	49	32.2	1.7	20	1.2	22	44	5	5	0.481	0.4634
GBS878	5	49.3333	31.3333	2.16667	15	1.33333	28.971	22.8	5	5	0.0358	0.054
GBS904	5	20.6	14.7	1.4	8	0.8	47.5	69.4	5	5	0.6735	0.6885
GBS890	5	54.2	28.6	2	19.1	0.8	30	32	5	5	0.2935	0.2203
GBS898	5	45	26.75	2	17.125	0.5	56	52	4	5	0.4536	0.5555
GBS876	5	42.4	32.2	1.3	12.6	1.8	42.579	45.6	4	3.6	0.3844	0.3277
GBS883	5	51.6	31.4	1.9	21.7	0.2	53.4	67.2	4.4	3.1	0.6785	0.7045
GBS911	5	49	34.4	2.9	20.8	0	49.1429	56.1667	4.57143	4.42857	0.4568	0.488
GBS895	5	33.5	15.5	2.25	19	0	40.567	43.6	5	5	0.3292	0.35
GBS918	5	45.8	31.4	2	19.9	0.8	52	54	4	3.625	0.5105	0.6266
CHECK1	6	50.4	40.2	3	16.9	0.2	65.459	58.5	2	2	0.751	0.873
CHECK2	6	43.2	36.4	5.2	16.2	0	47.6	66	4.3	2.5	0.5883	0.4885
CHECK3	6	48.16	41.4	2.9	15.8	1.6	22	48	5	5	0.4797	0.5317
GBS914	6	37.2	35.4	3.1	7.6	1	23.569	21.5	5	5	0.2604	0.2248
GBS915	6	38.4	35.4	6.6	14.8	0	45.712	40	3	3	0.4035	0.3268
GBS900	6	50.6	34.2	5	17.8	1	10	15	5	5	0.2605	0.2373
GBS879	6	42.2	42.6	4.8	14.4	0.6	28.567	32.615	5	5	0.434	0.3306
GBS880	6	47.6	41.6	6	19	0.8	62.5	66.3333	5	4.33333	1.161	1.0255
GBS922	6	46	44.8	3.1	12.2	1.4	44.125	36.2857	4.875	3.71429	0.2495	0.3475
GBS908	6	38	28.5	2.5	3.16667	0	38.75	38.75	4	4.375	0.5762	0.2714
GBS916	6	27.6	26.8	2.7	7.2	0.6	30.75	41.3333	4.5	5	0.218	0.1964
GBS901	6	39	30.2	3	15	0.4	35.569	40.25	4	3.75	0.346	0.367
CHECK1	7	47	28.8	2	24	0	68	64.6	2.7	1.6	0.5745	0.561
CHECK2	7	54.2	32.8	1.6	18.2	0.6	69	52.4	3.1	1.4	0.627	0.6935
CHECK3	7	51.6	38.2	2.6	19.8	0.4	44	50.25	5	5	0.6305	0.4945
GBS932	7	39	23.4	1.8	18.4	0.4	52.5	61.2	4.125	2.9	0.4185	0.2945
GBS924	7	50.3333	25.3333	1.83333	20.6667	1.33333	15.566	14.455	5	5	0.1334	0.1493
GBS928	7	37.4	29	1.2	13.2	2.2	15.4	12.555	5	5	0.0695	0.0842
GBS917	7	40.6	24	1.3	14.4	0.8	12.565	14.456	5	5	0.1596	0.2098
GBS921	7	42.8	27	1.64	15.1	1	29.8	27	5	5	0.229	0.1883
GBS930	7	41.2	35.2	2.4	16.3	2.2	18.2222	22.5714	4.11111	5	0.0655	0.0532
GBS912	7	61.4	40.8	1.8	10.4	3.4	10	10	5	5	0.0673	0.0671
GBS929	7	62	54	4.4	19.8	1	45.4	42.2	2	2.2	0.1735	0.1663
GBS925	7	41.2	32.4	3	16.8	0.2	10	60	3	2	0.7179	0.6264
GBS927	7	44.2	36	2.7	17.7	0	53.8	56	3.3	4.2	0.4705	0.583
CHECK1	8	53.6	34.4	4.2	23.6	0	66	57.3333	2.5	3.5	0.741	0.6545
CHECK2	8	43.6	32.8	3.2	19.6	0	50.2857	59	4.71429	2.5	0.7235	0.6681
CHECK3	8	41	32.5	2	19	0.333333	44	54.4444	5	4.55556	0.5741	0.8106
GBS003	8	32.4	28.6	4.6	14.4	0	61	61	3.66667	3.66667	0.3792	0.3332
GBS923	8	44.4	29.2	5.4	20.7	0	35.5	41.6	4	3.6	0.3975	0.3228
GBS047	8	39.6	30.8	4.3	10.8	0	47.1429	42	3.71429	5	0.3185	0.2685
GBS034	8	40.6	32.6	2.6	10.7	0	32.2857	48.25	4.28571	2.75	0.2718	0.2
GBS877	8	52	45.6	6.6	17.4	0.2	52.2	43.5	3.5	3.625	0.4015	0.536
GBS897	8	62.4	49.4	2.2	22.8	1	30.4	33.4	5	5	0.3932	0.2875
GBS283	8	39.6	30.4	5.2	17.6	0	80	87	5	5	1.5355	1.5954
GBS875	8	45	37.6	2.4	16	0.2	37.3333	41.1429	2.11111	3.28571	0.2705	0.246
GBS906	8	41.8	34.2	3	13.4	0.4	24.8	31.6	3.4	3.6	0.1768	0.1786
CHECK1	9	45	29.6	4.6	23.6	0	66	57.3333	2.5	3.5	0.6968	0.6392
CHECK2	9	44.2	36.4	4.6	19.6	0	50.2857	68.5	4	3.75	0.7306	0.731
CHECK3	9	55	43.6	2.8	16.4	2	39.3333	57.5	5	4.5	1.242	0.8893
GBS913	9	46	35	1	13.4	0.4	24.8	31.6	3.4	3.6	0.1425	0.1155
GBS639	9	48.2	33.4	3.6	17.4	0.2	52.2	43.5	3.5	3.625	0.5315	0.4258
GBS905	9	23.2	21.2	3.2	20.6	2	50.555	55	4	4	0.7565	0.9235
GBS018	9	52	34.6	3.8	18	2	46	42	3	4	0.58	0.6355
GBS872	9	44.8	29.4	3.8	15.4	2.5	50	56.2222	1	3.625	0.705	0.5765
GBS892	9	49.2	36.4	3	17.5	2.8	46	49.3333	5	4.88889	0.8845	0.8985
GBS894	9	32.8	23.6	4.4	18.4	1.8	25.634	30.8571	4	3.625	0.1865	0.1785
CHECK1	10	46.8	43.8	4	16.2	1.2	48	59	4.75	3.625	0.6385	0.6445
CHECK2	10	40	30.8	4.2	20.2	1.4	63.25	57.25	3.77778	2.75	0.5083	0.6235
CHECK3	10	35.6	21.8	3	16.4	2	35.5	51.6667	5	5	0.4945	0.456
GBS032	10	40	30.8	7	19.4	1.8	56.75	48.5	4.625	3.85714	0.3862	0.273
GBS882	10	40.8	33	4.8	14.2	1.4	54.25	58.8571	4.375	3.75	0.7554	0.7115
GBS910	10	37.6	28.2	4.4	14	1.6	26.6667	23	3.4	4	0.2449	0.218
GBS920	10	53.6	40	5.6	20.2	1.6	40.25	51.1429	4.875	3.85714	0.3938	0.4975
GBS029	10	36	31.6	3.4	10	0.8	27.25	39.25	4.125	5	0.4055	0.338
GBS909	10	57.6667	39.3333	4	18	1	39.3333	55.1429	3.66667	3.28571	0.6095	0.557
GBS903	10	51.2	41.8	4	16.2	1.6	57.1429	55.4286	4.85714	3.14286	0.283	0.3
GBS041	10	32	28.4	2.4	9	1.4	46	50	4	4	0.2065	0.2223
GBS919	10	41.4	36.2	3	9	2.6	60	64	5	4.875	1.2215	1.0256
